# Supplementary material for: Extremely Low Frequency Magnetic Fields Do Not Affect LTP-Like Plasticity in Healthy Humans
Source: Front Hum Neurosci. 2020 Feb 5;14:14. doi: 10.3389/fnhum.2020.00014 (PMC7014826; doi:10.3389/fnhum.2020.00014)
Supplement: TABLE S1 — MEP recordings. [file Table_1.XLSX]

## Sheet: Sheet1
ID	Right_Real_pre2	Right_Real_pre1	Right_Real_post2	Right_Real_post1	Right_Sham_pre2	Right_Sham_pre1	Right_Sham_post2	Right_Sham_post1	Left_Real_pre2	Left_Real_pre1	Left_Real_post2	Left_Real_post1	Left_Sham_pre2	Left_Sham_pre1	Left_Sham_post2	Left_Sham_post1
S01	1333.2	1139	1301.3	1217.8	914.8	1072.8	972	754.211	876.45	1141	325.625	459.316	568.737	614.071	926.533	605.35
S02	1098.14	1666.92	1571.85	1208.75	559.2	1190.4	512.769	807.357	661.85	631.95	572.4	1021.4	1263.58	775.062	881.867	559.2
S03	514.55	558.053	949.65	1009.65	1183.6	538.95	678.267	968.4	1192.29	1762.54	1206.64	1666.12	1782.83	1020.43	1736.78	837.118
S04	690.533	414	358.6	618	538.417	652.9	667.833	518.857	352.273	886.462	441.6	443.733	537	521	320.111	521.643
S05	672.933	691.286	768.133	689.714	654.857	563.571	734.643	809.538	460.6	586.769	366.267	708.643	243.333	261.267	214.571	466.571
S06	670.25	704.95	771.2	649.7	861	1182.23	712.071	801.6	1503.45	1391.13	1841.2	1729.15	719.8	758.8	578.333	1009.47
S07	3365.62	1672.08	3057.71	2287.81	601	333.375	859.15	251.778	1198.12	1305.08	1536.12	2100.53	714.1	881.8	475.75	312
S08	269.286	443.905	296.947	439.789	222.176	278.875	435.071	237.563	249.45	416.111	403.381	591.158	383.4	322.158	225.444	105.857
S09	943	791.5	991.867	651.5	1030.77	415.308	878.286	465.643	853.267	1034.53	878.571	792	422.143	999.267	380.583	311.714
S10	667.55	526.1	572.45	458	341.8	588.048	264.05	305.25	246.167	636.8	398.5	469.5	515.9	663.2	511	259
